# Supplementary material for: Substitutional Mo doping in a Ta3N5 photoanode: mitigating native defects through engineering and enhancing water-splitting performance
Source: Royal Society of Chemistry journal article supplement (doi:10.1039/d4nr05198j), 2025-01-01
Supplement: d4nr05198j1.pdf [file d4nr05198j1.pdf]

## Supporting Information

### Substitutional Mo Doping in Ta<sub>3</sub>N<sub>5</sub> Photoanode: Mitigating Native Defects engineering and Enhancing Water Splitting performance

Hameed Ullah <sup>a, b\*</sup>, Altaf Ur Rahman <sup>a, c</sup>, Ariadne Koche<sup>b</sup>, Carlos F.O. Graeff <sup>b</sup>, Marcus V. Castegnaro<sup>a</sup>, Marcos Jose leite Santos <sup>d</sup>, Sherdil Khan <sup>a\*</sup>

<sup>a</sup>Laboratory of Nanomaterials for Renewable Energy and Artificial Photosynthesis. Universidade Federal Do Rio Grande Do Sul, Porto Alegre, Brazil.

<sup>b</sup>Department of Physics and Meteorology, School of Sciences, Sao Paulo State University (UNESP), Bauru, Sao Paulo, 17033-360, Brazil.

<sup>c</sup>Department of Physics, Riphah International University, Chamru Pur Lahore, Punjab 54000, Pakistan.

<sup>d</sup>PPGCIMAT, Institute of Chemistry – UFRGS, 91501-970, Porto Alegre, RS, Brazil.

\*[Sherdil.khan@ufrgs.br](mailto:Sherdil.khan@ufrgs.br) and [hameed.ullah@unesp.br](mailto:hameed.ullah@unesp.br)

#### DFT Part GGA and GGA+U

In the literature, several methods have been developed to address the limitations of GGA in accurately predicting the bandgap of semiconductors. Approaches such as PBE0, HSE, and GGA+U are commonly employed to approximate bandgaps closer to experimental values. Hybrid functionals like PBE0 and HSE, though effective, are computationally expensive and tend to overestimate bandgap energies [1]. In comparison, the GGA+U method has proven to be a highly efficient alternative [2].

The GGA+U method introduces an on-site Coulomb interaction (U) to selected orbitals, resulting in an upward shift of the conduction band (CB) while leaving the valence band (VB) energies largely unaffected. This shift increases the bandgap, providing a more accurate representation of the electronic structure [3]. For systems like pure and Mo-doped Ta<sub>3</sub>N<sub>5</sub>, the addition of the Hubbard U parameter enhances the description of electronic properties and aligns computational results more closely with experimental observations [4]. By correcting the GGA method with the Hubbard U parameter, the electronic structure and material properties can be better understood and accurately modeled [5]. The Hubbard parameter, U, is defined as

$$U = uU_{\text{ion}} \quad (1)$$

Here,  $u$  is a constant ( $0 < U < 10$ ) determined by calibrating the calculated bandgap to match the experimental bandgap of the system [6], [7]. The  $U_{\text{ion}}$  values for  $\text{Ta}^{5+}$ ,  $\text{N}^{3-}$ , and  $\text{Mo}^{4+}$  are listed in Table S1.

Table S1  $U_{\text{ion}}$  values from literature

| Ion              | $U_{\text{ion}}$ | Ref |
|------------------|------------------|-----|
| $\text{Ta}^{5+}$ | 14.05            | [4] |
| $\text{N}^{3-}$  | 9.33             | [4] |
| $\text{M}^{4+}$  | 6.45             | [8] |

Table S2  $u$  values for present work

| $u$ | $U \text{ (eV)} = uU_{\text{ion}}$ |      |      |
|-----|------------------------------------|------|------|
|     | Ta                                 | N    | Mo   |
| 0.1 | 1.41                               | 0.93 | 0.65 |
| 0.2 | 2.82                               | 1.86 | 1.29 |

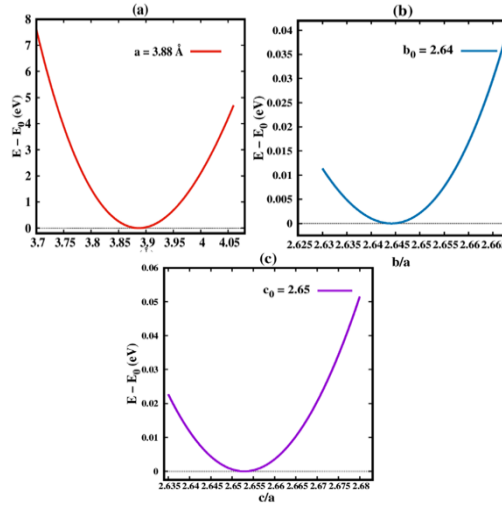

Fig. S1 Theoretical lattice constant (a)  $b/a$  ratio and (c) represent the  $c/a$  ratio of pure  $\text{Ta}_3\text{N}_5$  unit cell.

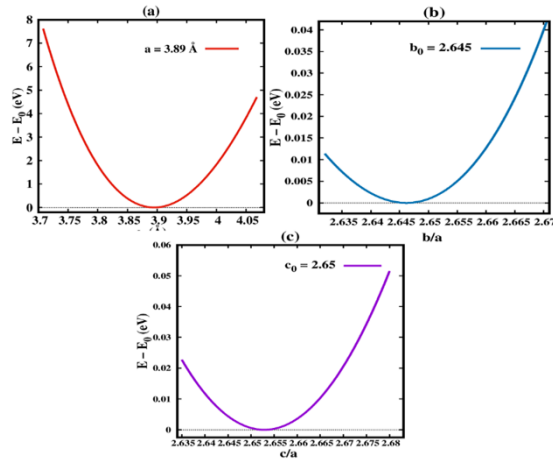

Fig. S2 Theoretical lattice constant (a)  $b/a$  ratio and (c) represent the  $c/a$  ratio of  $\text{MTN}_x$  unit cell.

Table S3 Experimental and theoretical lattice parameters of MTN<sub>x</sub>.

|              | A<br>(Å) | B (Å) | C (Å) | $\alpha$ (°) | $\beta$ (°) | $\gamma$ (°) | Ref             |
|--------------|----------|-------|-------|--------------|-------------|--------------|-----------------|
| Experimental | 3.88     | 10.21 | 10.26 | 90           | 90          | 90           | Present<br>Work |
| Theoretical  | 3.88     | 10.24 | 10.28 | 90           | 90          | 90           | Present<br>Work |
| Theoretical  | 3.87     | 10.23 | 10.29 | 90           | 90          | 90           | [9]             |

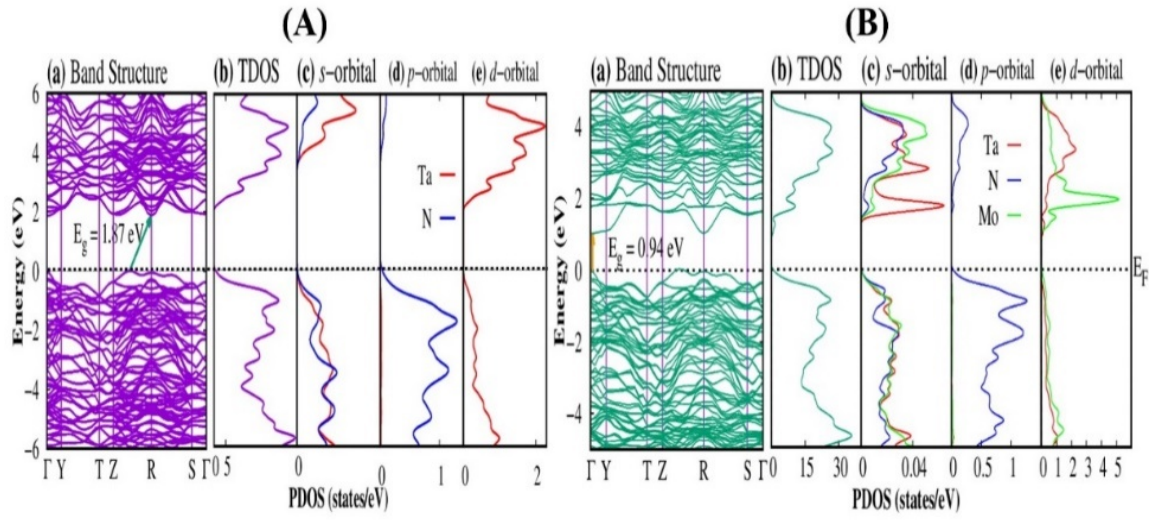

Fig. S3 The GGA+U calculated bandgap for (A) pure and (B)  $\text{MTN}_x$  where  $u = 0.1$ .

Table S4 The optical bandgap of bare  $\text{Ta}_3\text{N}_5$  and  $\text{MTN}_x$ .

| Simple                      | Optical<br>bandgap with<br>GGA | Optical bandgap<br>with GGA+U | $\epsilon_1^{Average}(0)$<br>With GGA | $\epsilon_1^{Average}(0)$<br>With<br>GGA+U |
|-----------------------------|--------------------------------|-------------------------------|---------------------------------------|--------------------------------------------|
| $\text{Ta}_3\text{N}_5$     | 1.40 eV                        | 2 eV                          | 8.9                                   | 6                                          |
| Mo- $\text{Ta}_3\text{N}_5$ | 0.98 eV                        | 1.20 eV                       | 11.58                                 | 8.31                                       |

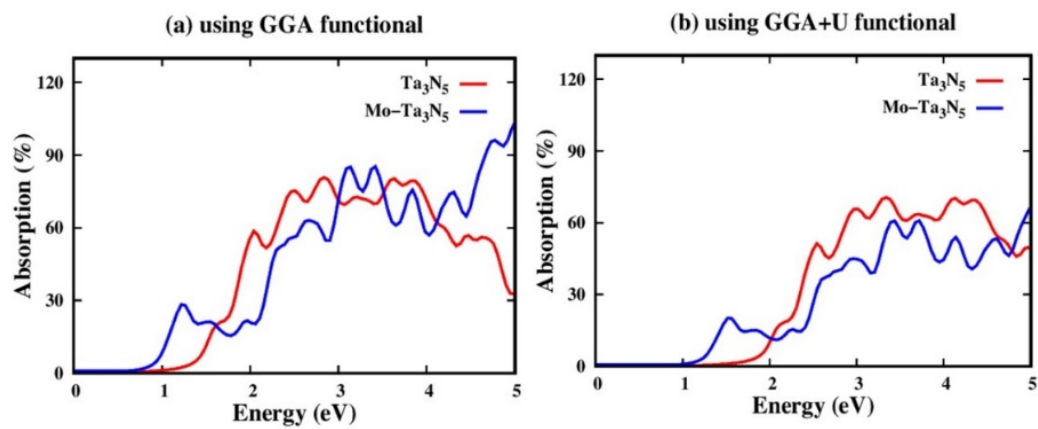

Fig. S4 Absorption coefficient for bare  $\text{Ta}_3\text{N}_5$  and  $\text{MTN}_x$ .

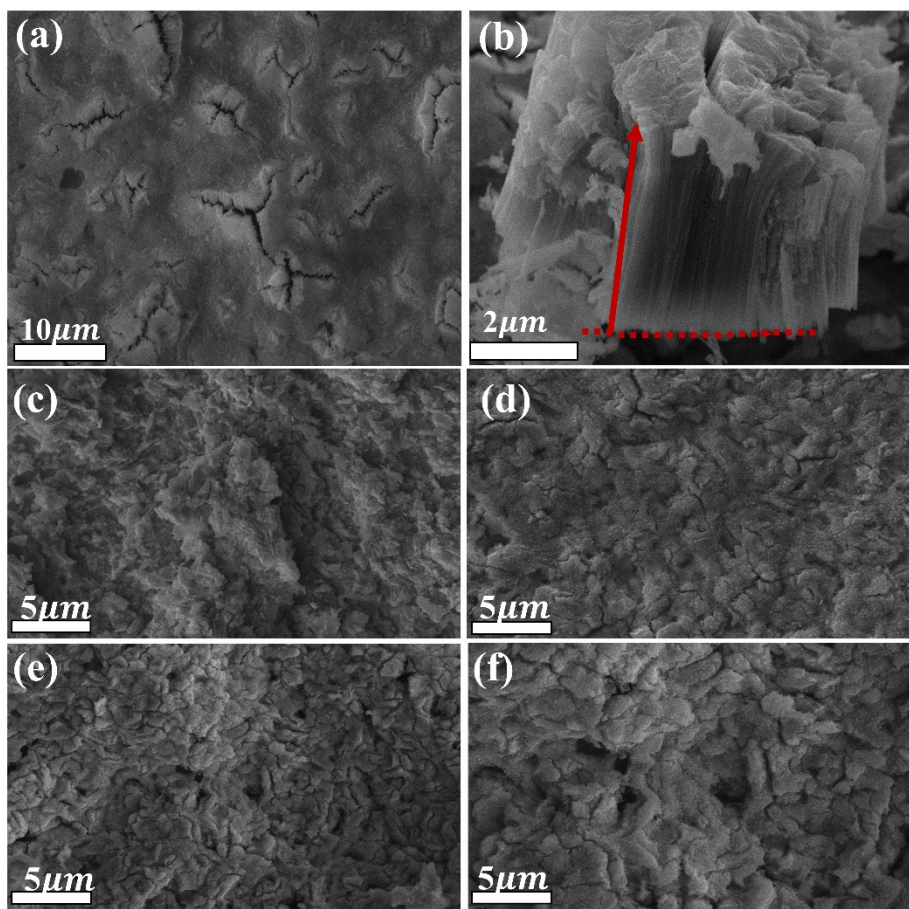

Fig. S5 Top view SEM image of  $\text{Ta}_2\text{O}_5$  nanotubes (NTs), while (b) is the cross-section view of  $\text{Ta}_2\text{O}_5$  NTs obtained in the electrolyte containing  $\text{H}_2\text{SO}_4$  +1Vol% HF + 4 Vol%  $\text{H}_2\text{O}$ . The red arrow represents the length of the NTs while the dash lines highlighted the boundary between Ta substrate and  $\text{Ta}_2\text{O}_5$  NTs. While (c), (d), (e) and (f) represent the top view of  $\text{Ta}_3\text{N}_5$ , MTN-0.1, MTN-0.3 and MTN-0.5 respectively.

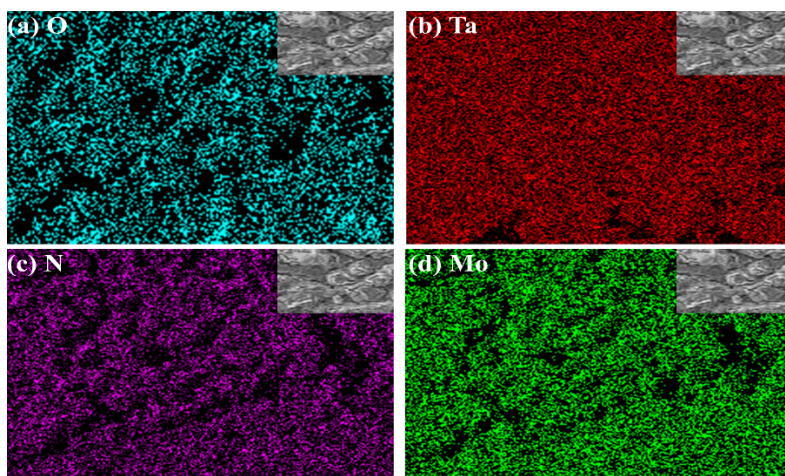

Fig. S6. EDX elemental mapping images of  $\text{MTN}_x$ .

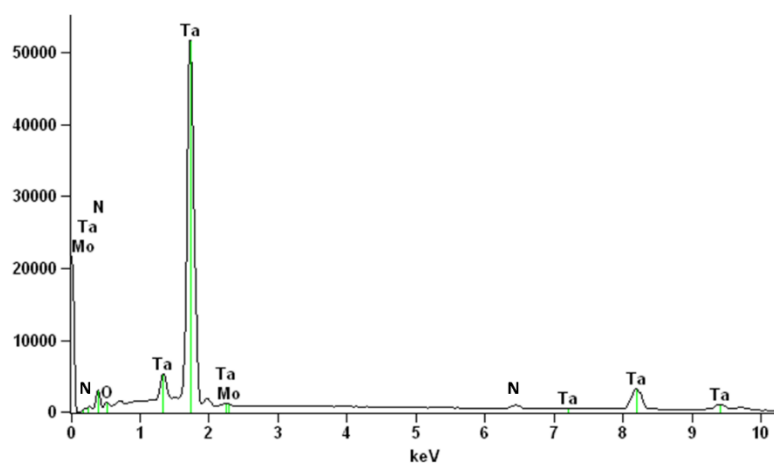

Fig. S7 Energy Dispersive X-ray Spectroscopy (EDX) Elemental Spectrum Analysis of  $\text{MTN}_x$ .



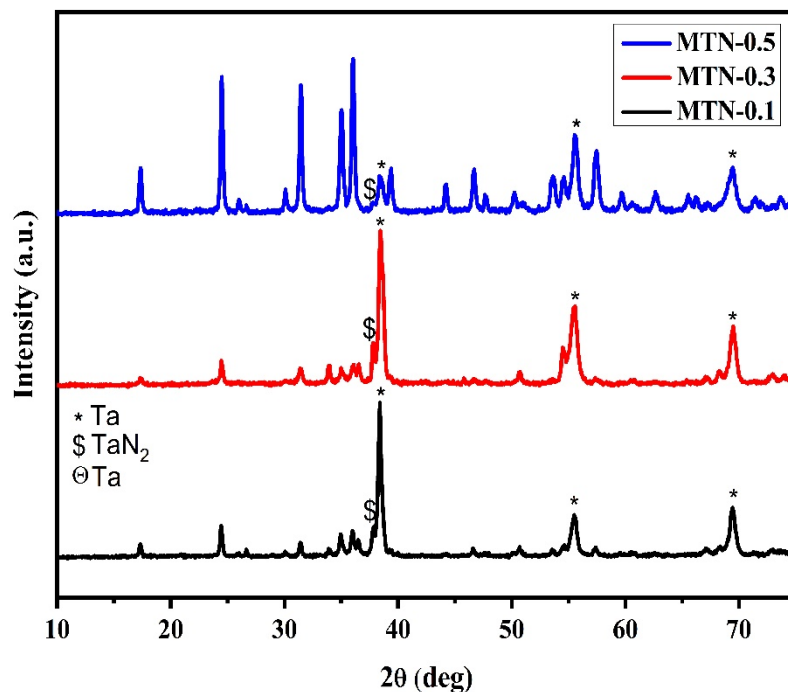

Fig. S8 XRD of Mo doped sample after PEC measurements.

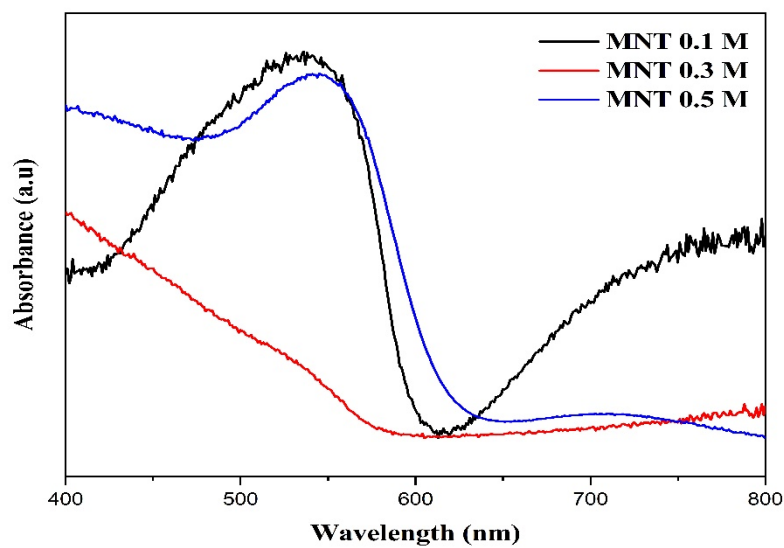

Fig. S9 UV-visible absorption spectra after PEC measurements.

Table S5. EDX table of all samples with wt.% of each element.

Elemental analysis (Wt%)

| Sample                         | O     | N     | Ta    | S    | Mo   |
|--------------------------------|-------|-------|-------|------|------|
| Ta <sub>2</sub> O <sub>5</sub> | 60.02 | 0     | 36.66 | 3.32 | 0    |
| Ta <sub>3</sub> N <sub>5</sub> | 5.35  | 57.44 | 37.21 | 0    | 0    |
| MTN-0.1                        | 6.37  | 54.99 | 38.22 | 0    | 0.42 |
| MTN-0.3                        | 8     | 55.60 | 35.35 | 0    | 1.05 |
| MTN-0.5                        | 9     | 51.68 | 36.53 | 0    | 2.75 |

Table S6. Experimental bandgap and absorption edge of bare Ta<sub>3</sub>N<sub>5</sub> and MTN<sub>x</sub>.

| Sample                              | Bang gap (eV) | Absorption edge (nm) |
|-------------------------------------|---------------|----------------------|
| Pure Ta <sub>3</sub> N <sub>5</sub> | 2.10          | 613                  |
| MTN-0.1                             | 2.05          | 617                  |
| MTN-0.3                             | 2.04          | 640                  |
| MTN-0.5                             | 2.05          | 634                  |

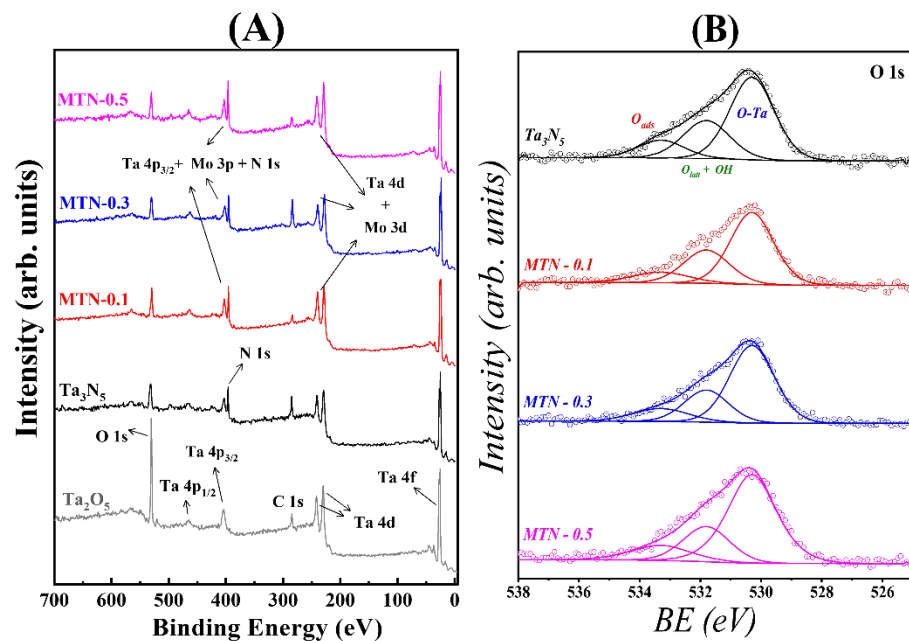

Fig. S10. (a) Survey scan XPS spectra from 0 to 900 eV of bare Ta<sub>3</sub>N<sub>5</sub> and MTN<sub>x</sub>. (b) Deconvoluted O1s spectra of bare Ta<sub>3</sub>N<sub>5</sub> and MTN<sub>x</sub>.

Table S7. Summarize results of XPS of bare Ta<sub>3</sub>N<sub>5</sub> and MTN<sub>x</sub>.

| Samples                        | N/Ta | O/Ta | Mo/Ta | Ref          |
|--------------------------------|------|------|-------|--------------|
| Ta <sub>2</sub> O <sub>5</sub> | ---  | 1.70 | ----  | Present Work |
| Ta <sub>3</sub> N <sub>5</sub> | 1.50 | 0.20 | ---   | Present Work |
| Ta <sub>3</sub> N <sub>5</sub> | 1.59 | 0.22 | ----- | [79]         |
| MTN-0.1                        | 1.45 | 0.30 | 0.10  | Present Work |
| MTN-0.3                        | 1.49 | 0.50 | 0.15  | Present Work |
| MTN-0.5                        | 1.58 | 1.13 | 0.17  | Present Work |

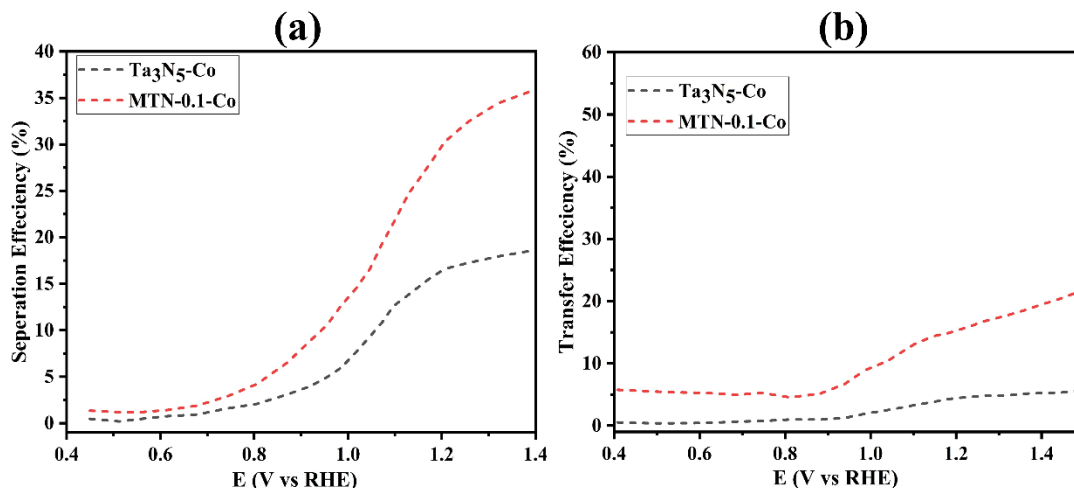

Fig. S11 (a) Bulk charge separation efficiency and (b) surface charge transfer efficiency of bare  $\text{Ta}_3\text{N}_5$  and MTN-0.1 with  $\text{Co}(\text{OH})_x$  co-catalyst.

## References

- [1] M. Harb *et al.*, “Tuning the properties of visible-light-responsive tantalum (oxy)nitride photocatalysts by non-stoichiometric compositions: A first-principles viewpoint,” *Phys. Chem. Chem. Phys.*, vol. 16, no. 38, pp. 20548–20560, Sep. 2014, doi: 10.1039/c4cp03594a.
- [2] M. Cococcioni and S. De Gironcoli, “Linear response approach to the calculation of the effective interaction parameters in the LDA+U method,” *Phys. Rev. B - Condens. Matter Mater. Phys.*, vol. 71, no. 3, Jan. 2005, doi: 10.1103/PhysRevB.71.035105.
- [3] V. N. Jafarova and G. S. Orudzhev, “Structural and electronic properties of ZnO: A first-principles density-functional theory study within LDA(GGA) and LDA(GGA)+U methods,” *Solid State Commun.*, vol. 325, Feb. 2021, doi: 10.1016/j.ssc.2020.114166.
- [4] H. Jouypazadeh, H. Farrokhpour, and M. M. Momeni, “Theoretical investigation of the water splitting photocatalytic properties of pristine, Nb and V doped, and Nb-V co-doped (1 1 1) TaON nanosheets,” *Appl. Surf. Sci.*, vol. 541, Mar. 2021, doi: 10.1016/j.apsusc.2020.148572.

- [5] J. Wang, T. Fang, L. Zhang, J. Feng, Z. Li, and Z. Zou, "Effects of oxygen doping on optical band gap and band edge positions of Ta<sub>3</sub>N<sub>5</sub> photocatalyst: A GGA + U calculation," *J. Catal.*, vol. 309, pp. 291–299, 2014, doi: 10.1016/j.jcat.2013.10.014.
- [6] P. Rani, G. S. Dubey, and V. K. Jindal, "DFT study of optical properties of pure and doped graphene," *Phys. E Low-Dimensional Syst. Nanostructures*, vol. 62, pp. 28–35, 2014, doi: 10.1016/j.physe.2014.04.010.
- [7] P. Krisna Das *et al.*, "Nanoporous Ta<sub>3</sub>N<sub>5</sub>: Via electrochemical anodization followed by nitridation for solar water oxidation," *Dalt. Trans.*, vol. 49, no. 42, pp. 15023–15033, Nov. 2020, doi: 10.1039/d0dt03056b.
- [8] R. Tesch and P. M. Kowalski, "Hubbard U parameters for transition metals from first principles," *Phys. Rev. B*, vol. 105, no. 19, May 2022, doi: 10.1103/PhysRevB.105.195153.
- [9] H. Jouypazadeh, H. Farrokhpour, and M. M. Momeni, "A DFT study of the water-splitting photocatalytic properties of pristine, Nb-doped, and V-doped Ta<sub>3</sub>N<sub>5</sub> monolayer nanosheets," *Surfaces and Interfaces*, vol. 26, Oct. 2021, doi: 10.1016/j.surfin.2021.101379.
- [10] Z. Wang *et al.*, "Insight into the charge transfer in particulate Ta<sub>3</sub>N<sub>5</sub> photoanode with high photoelectrochemical performance," *Chem. Sci.*, vol. 7, no. 7, pp. 4391–4399, 2016, doi: 10.1039/c6sc00245e.
- [11] J. Feng *et al.*, "Ge-mediated modification in Ta<sub>3</sub>N<sub>5</sub> photoelectrodes with enhanced charge transport for solar water splitting," *Chem. - A Eur. J.*, vol. 20, no. 49, pp. 16384–16390, 2014, doi: 10.1002/chem.201402760.
